# Supplementary material
Source: Springer Nature journal article supplement (https://www.springermedizin.de/resource/supplementary/12877_2013_957_MOESM5_ESM.pdf/9440774)

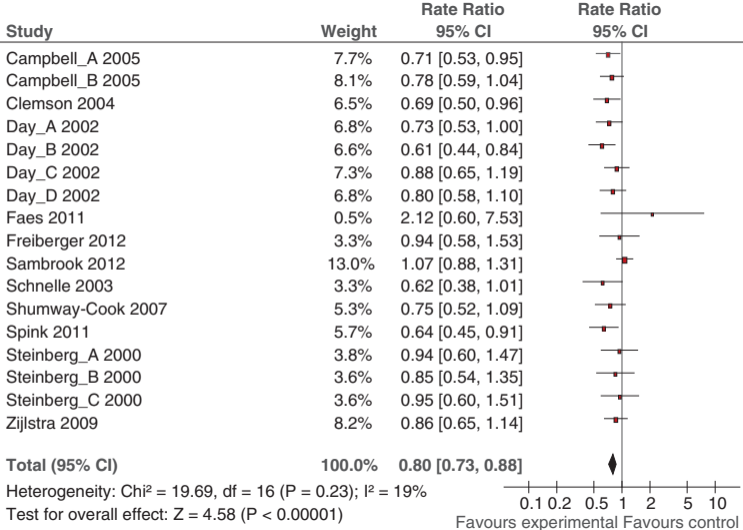

Supplement: MOESM5 [file 9440774]
